# Supplementary material for: Phenotypic and Genetic Studies of the Viral Lineage Associated with the Recent Yellow Fever Outbreak in Brazil
Source: MDPI journal article supplement (doi:10.3390/v14081818), 2022-08-19
Supplement: s1 [file s1]

## *Supplementary Material*

### **Phenotypic and genetic studies of the viral lineage associated with the recent yellow fever outbreak in Brazil**

**Authors:** Nathália Dias Furtado<sup>1</sup>, Mariela Martínez Gómez<sup>1</sup>, Iasmim Silva de Mello<sup>1</sup>, Déberli Ruiz Fernandes<sup>1</sup>, Myrna Cristina Bonaldo<sup>1\*</sup>

<sup>1</sup> Laboratório de Biologia Molecular de Flavivírus, Instituto Oswaldo Cruz-Fiocruz, Rio de Janeiro, Brazil

\* Correspondence author: [mbonaldo@ioc.fiocruz.br](mailto:mbonaldo@ioc.fiocruz.br)

**Table S1.** Oligonucleotide sequences for the site-directed mutagenesis in NS3 and NS5 proteins.

| Forward Primer |                                             | Reverse Primer |                                             |
|----------------|---------------------------------------------|----------------|---------------------------------------------|
| ID             | Sequence (5' → 3')                          | ID             | Sequence (5' → 3')                          |
| NS3_D88E(+)    | GGCGGCTCATGGAAGTTGGAGGGTAGA<br>TGGGAT       | NS3_D88E(-)    | ATCCCATCTACCCTCCAACCTCCATGAG<br>CCGCC       |
| NS3_K121R(+)   | CCAAGCCTATTCAAGGTTAGGAATGGA<br>GGAGAAATTGGG | NS3_K121R(-)   | CCCAATTTCTCCTCCATTCCTAACCTTG<br>AATAGGCTTGG |
| NS5_R101K(+)   | GAGAAGTGAGTGGGGTCAAGGGATTCA<br>CCCTT        | NS5_R101K(-)   | AAGGGTGAATCCCTTGACCCCACTCACT<br>TCTC        |
| NS5_I138V(+)   | CCATCGCCTTGAGCCGGTAAAGTGTGAT<br>ACCCT       | NS5_I138V(-)   | AGGGTATCACACTTTACCGGCTCAAGG<br>CGATGG       |
| NS5_S173G(+)   | CTGTTGAGAAATGGTTGGGCTGTGGTGT<br>TGAAAGC     | NS5_S173G(-)   | GCTTTCAACACCACAGCCCAACCATTTTC<br>TCAACAG    |
| NS5_S297N(+)   | CACCGCCACTTGGTTCCATGATAATGAC<br>AACCCTTA    | NS5_S297N(-)   | TAAGGGTTGTCATTATCATGGAACCAA<br>GTGGCGGTG    |
| NS5_A634V(+)   | GGACTGTGACGACACGGTTTTGACCAAG<br>CTTGAAG     | NS5_A634V(-)   | CTTCAAGCTTGGTCAAAACCGTGTCGTC<br>ACAGTCC     |
| NS5_S709N(+)   | AAAAGGATGGGATGACTGGGAGAATGT<br>GCCCTTTTG    | NS5_S709N(-)   | CAAAAGGGCACATTCTCCCAGTCATCC<br>CATCCTTTT    |

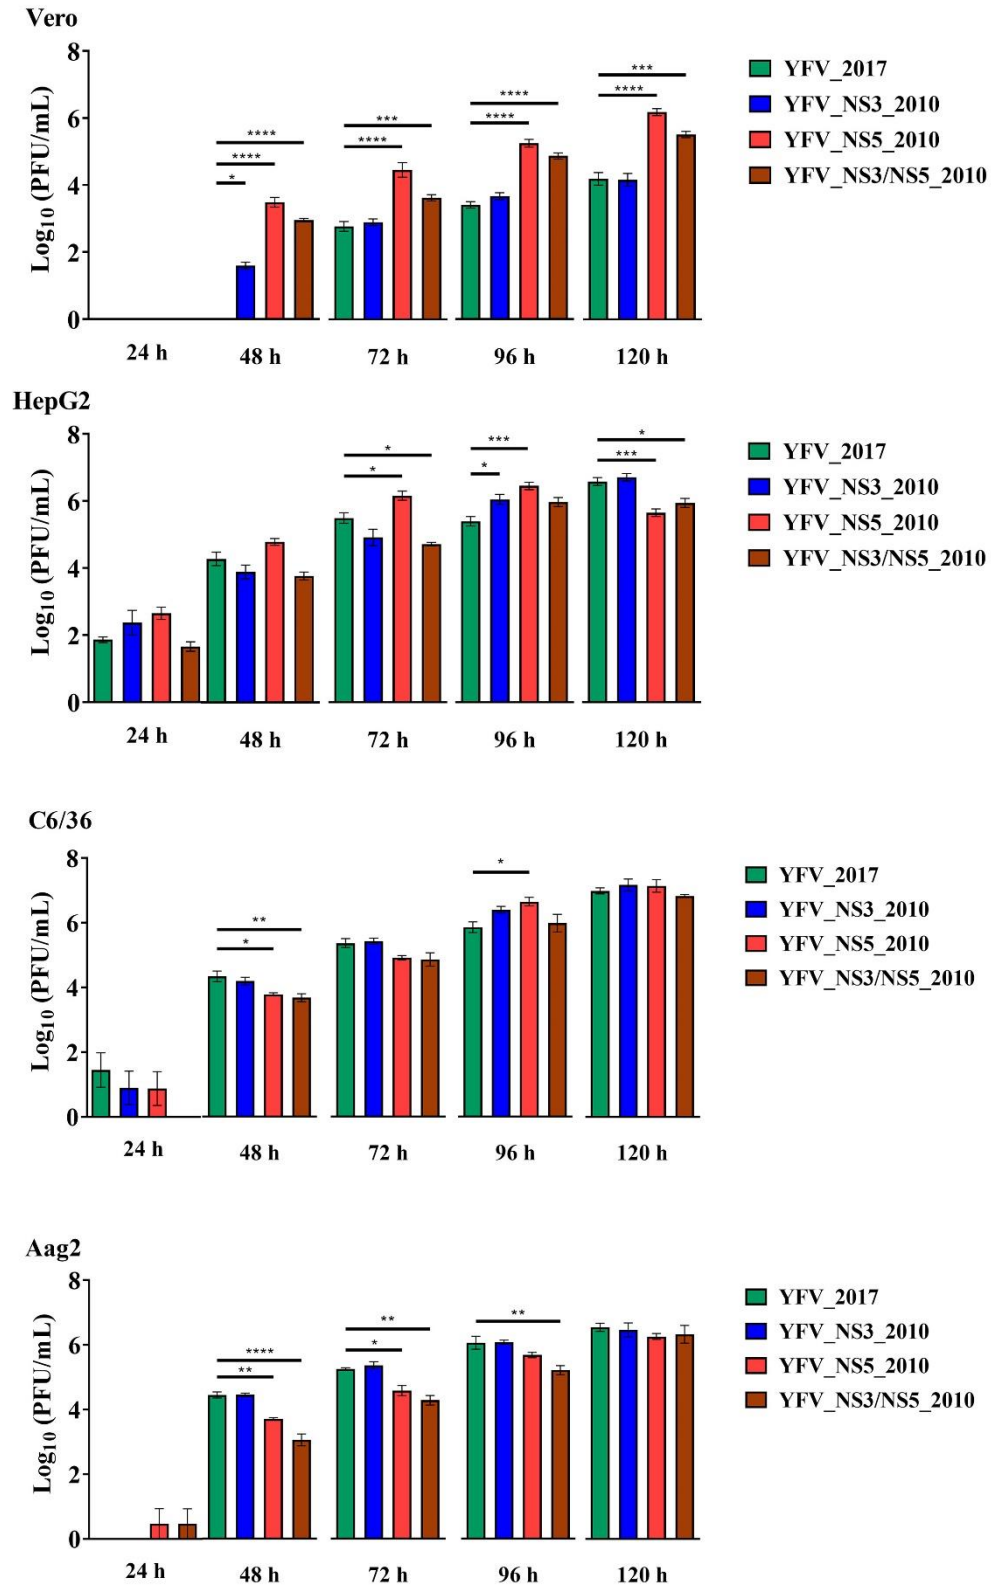

**Figure S1.** Statistical analysis of the viral replication kinetics in Vero (A), HepG2 (B), C6/36 (C) and Aag2 (D). Viral titers average of each YFV isolate were compared using One-way ANOVA with Dunnett's multiple comparisons test: \* represents  $p \leq 0.05$ , \*\* represents  $p \leq 0.01$ , \*\*\* represents  $p \leq 0.001$  and \*\*\*\* represents  $p \leq 0.0001$ .

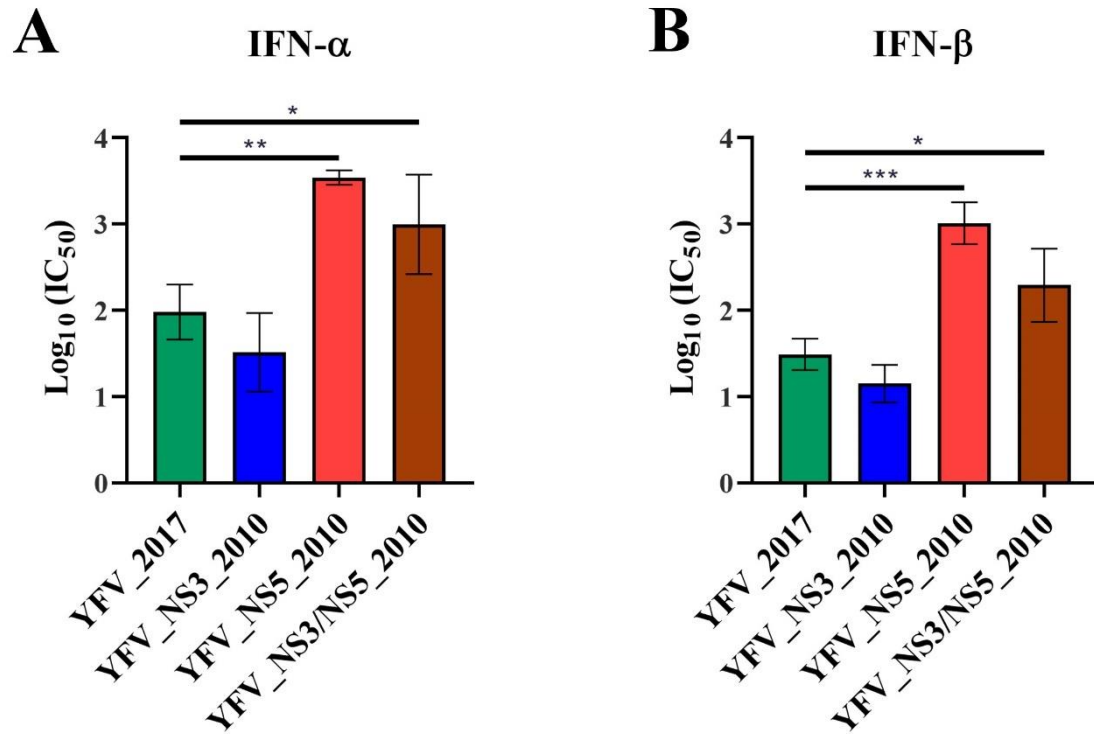

**Figure S2.** Statistical analysis of IC<sub>50</sub> values generated after viral infection under treatment with IFN-I. The IC<sub>50</sub> values of each replicate were plotted in a column table and analyzed for statistical differences. The test applied was One-way ANOVA with Dunnett's multiple comparisons test: \* represents  $P \leq 0.05$ , \*\* represents  $P \leq 0.01$ , \*\*\* represents  $P \leq 0.001$  and \*\*\*\* represents  $P \leq 0.0001$ .

**Table S2.** Follow-up of viral RNA copies/mL in blood samples from infected AG129 mice

| Inoculated virus | Mouse | Survival time (days) | Viremia in RNA copies/mL by day post-inoculation (d.p.i.) |                                         |                                         |                    |                    |                    |
|------------------|-------|----------------------|-----------------------------------------------------------|-----------------------------------------|-----------------------------------------|--------------------|--------------------|--------------------|
|                  |       |                      | 2                                                         | 4                                       | 6                                       | 7                  | 8                  | 16                 |
| YFV 2017         | 1     | 16                   | 0.00                                                      | $7.96 \times 10^2$                      | $1.91 \times 10^4$                      | n.d.               | $7.35 \times 10^3$ | $7.28 \times 10^1$ |
|                  | 2     | 16                   | 0.00                                                      | $2.20 \times 10^2$                      | $2.05 \times 10^4$                      | n.d.               | $4.03 \times 10^3$ | $1.42 \times 10^2$ |
|                  | 3     | 16                   | 0.00                                                      | $4.53 \times 10^2$                      | $3.53 \times 10^4$                      | n.d.               | $2.48 \times 10^4$ | $8.62 \times 10^0$ |
|                  | 4     | 6                    | $7.11 \times 10^2$                                        | $7.42 \times 10^4$                      | $1.53 \times 10^5$                      | ●                  | ●                  | ●                  |
|                  | 5     | 6                    | $1.64 \times 10^3$                                        | $1.65 \times 10^5$                      | $1.86 \times 10^5$                      | ●                  | ●                  | ●                  |
|                  | 6     | 16                   | $2.30 \times 10^3$                                        | $3.13 \times 10^5$                      | <b><math>6.15 \times 10^{5*}</math></b> | n.d.               | $1.86 \times 10^5$ | $1.45 \times 10^3$ |
| YFV NS3 2010     | 1     | 16                   | 0.00                                                      | $2.74 \times 10^2$                      | $7.35 \times 10^3$                      | n.d.               | $1.63 \times 10^3$ | $1.85 \times 10^2$ |
|                  | 2     | 16                   | $2.15 \times 10^1$                                        | $1.49 \times 10^2$                      | $1.73 \times 10^4$                      | n.d.               | $7.33 \times 10^3$ | $3.72 \times 10^2$ |
|                  | 3     | 16                   | 0.00                                                      | $1.25 \times 10^2$                      | $1.06 \times 10^4$                      | n.d.               | $1.39 \times 10^3$ | $1.54 \times 10^2$ |
|                  | 4     | 16                   | $2.91 \times 10^2$                                        | $6.56 \times 10^4$                      | $1.61 \times 10^4$                      | n.d.               | $1.68 \times 10^3$ | $2.90 \times 10^2$ |
|                  | 5     | 16                   | $4.53 \times 10^2$                                        | $6.04 \times 10^4$                      | $8.09 \times 10^4$                      | n.d.               | $1.02 \times 10^4$ | $1.01 \times 10^3$ |
|                  | 6     | 16                   | $2.65 \times 10^3$                                        | <b><math>1.28 \times 10^{5*}</math></b> | $1.18 \times 10^5$                      | n.d.               | $1.21 \times 10^4$ | $1.18 \times 10^3$ |
| YFV NS5 2010     | 1     | 7                    | 0.00                                                      | $1.37 \times 10^3$                      | $4.32 \times 10^5$                      | $8.94 \times 10^4$ | ●                  | ●                  |
|                  | 2     | 7                    | 0.00                                                      | $1.46 \times 10^3$                      | $3.51 \times 10^5$                      | $1.03 \times 10^5$ | ●                  | ●                  |
|                  | 3     | 7                    | $1.04 \times 10^1$                                        | $4.19 \times 10^3$                      | <b><math>4.06 \times 10^{6*}</math></b> | $9.31 \times 10^5$ | ●                  | ●                  |
|                  | 4     | 6                    | $2.29 \times 10^2$                                        | $2.02 \times 10^5$                      | $5.26 \times 10^5$                      | ●                  | ●                  | ●                  |
|                  | 5     | 6                    | $2.93 \times 10^2$                                        | $1.64 \times 10^5$                      | $2.20 \times 10^6$                      | ●                  | ●                  | ●                  |
|                  | 6     | 6                    | $1.01 \times 10^3$                                        | $2.78 \times 10^5$                      | $3.59 \times 10^6$                      | ●                  | ●                  | ●                  |
| YFV NS3/NS5 2010 | 1     | 7                    | 0.00                                                      | $4.44 \times 10^3$                      | $4.40 \times 10^5$                      | $6.38 \times 10^4$ | ●                  | ●                  |
|                  | 2     | 7                    | 0.00                                                      | $1.29 \times 10^2$                      | $1.25 \times 10^5$                      | $3.63 \times 10^4$ | ●                  | ●                  |
|                  | 3     | 7                    | 0.00                                                      | $1.05 \times 10^3$                      | $1.48 \times 10^5$                      | $5.04 \times 10^4$ | ●                  | ●                  |
|                  | 4     | 7                    | $6.42 \times 10^1$                                        | $9.77 \times 10^4$                      | $1.64 \times 10^6$                      | $1.05 \times 10^3$ | ●                  | ●                  |
|                  | 5     | 7                    | $3.24 \times 10^2$                                        | $1.99 \times 10^5$                      | <b><math>1.66 \times 10^{6*}</math></b> | $5.37 \times 10^3$ | ●                  | ●                  |
|                  | 6     | 7                    | $2.49 \times 10^2$                                        | $2.15 \times 10^5$                      | $1.13 \times 10^6$                      | $2.64 \times 10^3$ | ●                  | ●                  |

n.d.= non-determined viremia; ● = post-euthanasia period; \* viremia peak

**Average viremia at euthanasia for each YFV infected mice (RNA copies/mL):**

| Virus            | Day post-inoculation | Viremia (RNA copies/mL) |
|------------------|----------------------|-------------------------|
| YFV_2017         | 16                   | $4,19 \times 10^2$      |
|                  | 6                    | $1,69 \times 10^5$      |
| YFV_NS3_2010     | 16                   | $5,32 \times 10^2$      |
| YFV_NS5_2010     | 6                    | $2,11 \times 10^6$      |
|                  | 7                    | $3,74 \times 10^5$      |
| YFV_NS3/NS5_2010 | 7                    | $2,66 \times 10^4$      |

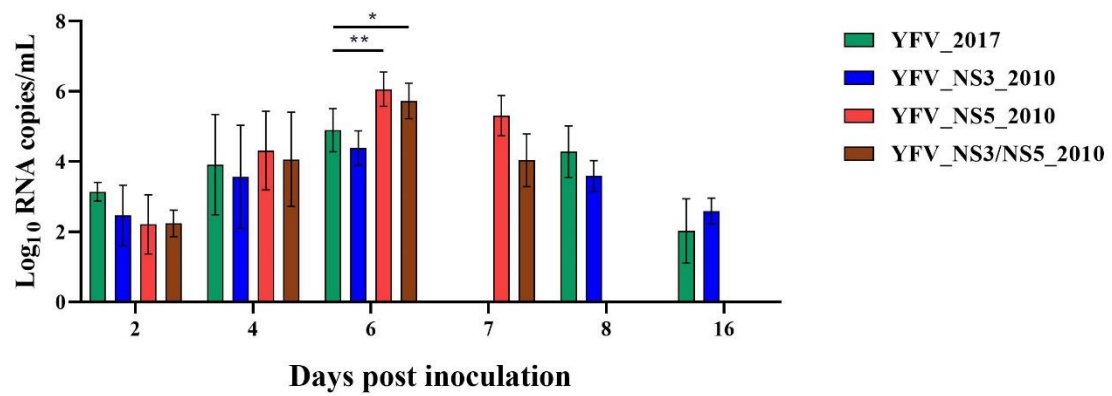

**Figure S3.** Statistical analysis of viremia values of viral RNA copies/mL in blood samples from infected AG129 mice. The log<sub>10</sub> values of viral loads in the blood of AG129 mice were compared by One-way ANOVA with Dunnett's multiple comparisons test: \* represents  $P \leq 0.05$ , \*\* represents  $P \leq 0.01$ .
